# Supplementary material
Source: PubMed Central journal article supplement (PMC7013267)
Supplement: baADV2019000765-suppl1.pdf [file baADV2019000765-suppl1.pdf]

Supplementary Information Materials

Supplemental Table 1. Prohibited concomitant medications and treatments

|                          |                |
|--------------------------|----------------|
| Albuterol                | Metaproterenol |
| Arformoterol             | Methacholine   |
| Bambuterol               | Olodaterol     |
| Bosutinib                | Pazopanib      |
| Beta-blockers (all)      | Pirbuterol     |
| Ceritinib                | Salmeterol     |
| Fenoterol                | Silodosin      |
| Floctafenine             | Terbutaline    |
| Formoterol               | Topotecan      |
| Herbal medications (all) | Vilanterol     |
| Indacaterol              | Vincristine    |
| Levalbuterol             |                |

Supplemental Table 2. Concomitant medications to be used with caution

|                                                         |                        |
|---------------------------------------------------------|------------------------|
| Abiraterone Acetate                                     | Lopinavir              |
| Afatinib                                                | Methotrimeprazine      |
| Alfuzosin                                               | Methoxsalen (Systemic) |
| Amifostine                                              | Methyldopa             |
| Aminophylline                                           | Methylergonovine       |
| Brimonidine (Ophthalmic)                                | Mexiletine             |
| Bromocriptine                                           | Norepinephrine         |
| Bupropion                                               | Norepinephrine         |
| Cabergoline                                             | Obinutuzumab           |
| Carbamazepine                                           | Ofloxacin (Systemic)   |
| Cinacalcet                                              | Paroxetine             |
| Ciprofloxacin (Systemic)                                | Phenobarbital          |
| Clonidine                                               | Phenoxybenzamine       |
| Cocaine                                                 | Phentolamine           |
| Colchicine                                              | Prazosin               |
| Dopamine                                                | Primaquine             |
| Doxorubicin                                             | Primidone              |
| Dabigatran Etexilate                                    | Rituximab              |
| Delavirdine                                             | Rifampin               |
| Dexmedetomidine                                         | Ritonavir              |
| Dihydroergotamine                                       | Rivaroxaban            |
| Doxazosin                                               | Rizatriptan            |
| Dronedarone                                             | Stiripentol            |
| Dyphylline                                              | Silodosin              |
| Epinephrine (Racemic, Systemic, Oral Inhalation, Nasal) | Tamsulosin             |
| Ergoloid Mesylates                                      | Terazosin              |
| Ergonovine                                              | Terbinafine (Systemic) |

|                                                 |               |
|-------------------------------------------------|---------------|
| Ergotamine                                      | Theophylline  |
| Everolimus                                      | Thiabendazole |
| Fluoxetine                                      | Thioridazine  |
| Fluvoxamine                                     | TiZANidine    |
| Grass Pollen Allergen Extract (5 Grass Extract) | Tipranavir    |
| Guanfacine                                      | QuiNIDine     |
| Isometheptene                                   | Vemurafenib   |
| Levonordefrin                                   | Vincristine   |

Supplemental Table 3. Influence of covariates on CTRA expression.

| Covariate       | Coefficient | p-value |
|-----------------|-------------|---------|
| Sex             | 0.43        | 0.05    |
| Race            | 0.32        | 0.11    |
| BMI             | -0.04       | 0.03    |
| Smoking         | -0.38       | 0.04    |
| Cytogenetics    | -0.36       | 0.08    |
| Disease stage 2 | -0.15       | 0.39    |
| Disease stage 3 | 0.18        | 0.54    |
